# Supplementary figures and images for: DNA sequence encodes the position of DNA supercoils
Source: eLife journal article supplement (doi:10.7554/elife.36557), 2018-12-07

Figure 1 - figure supplement 1

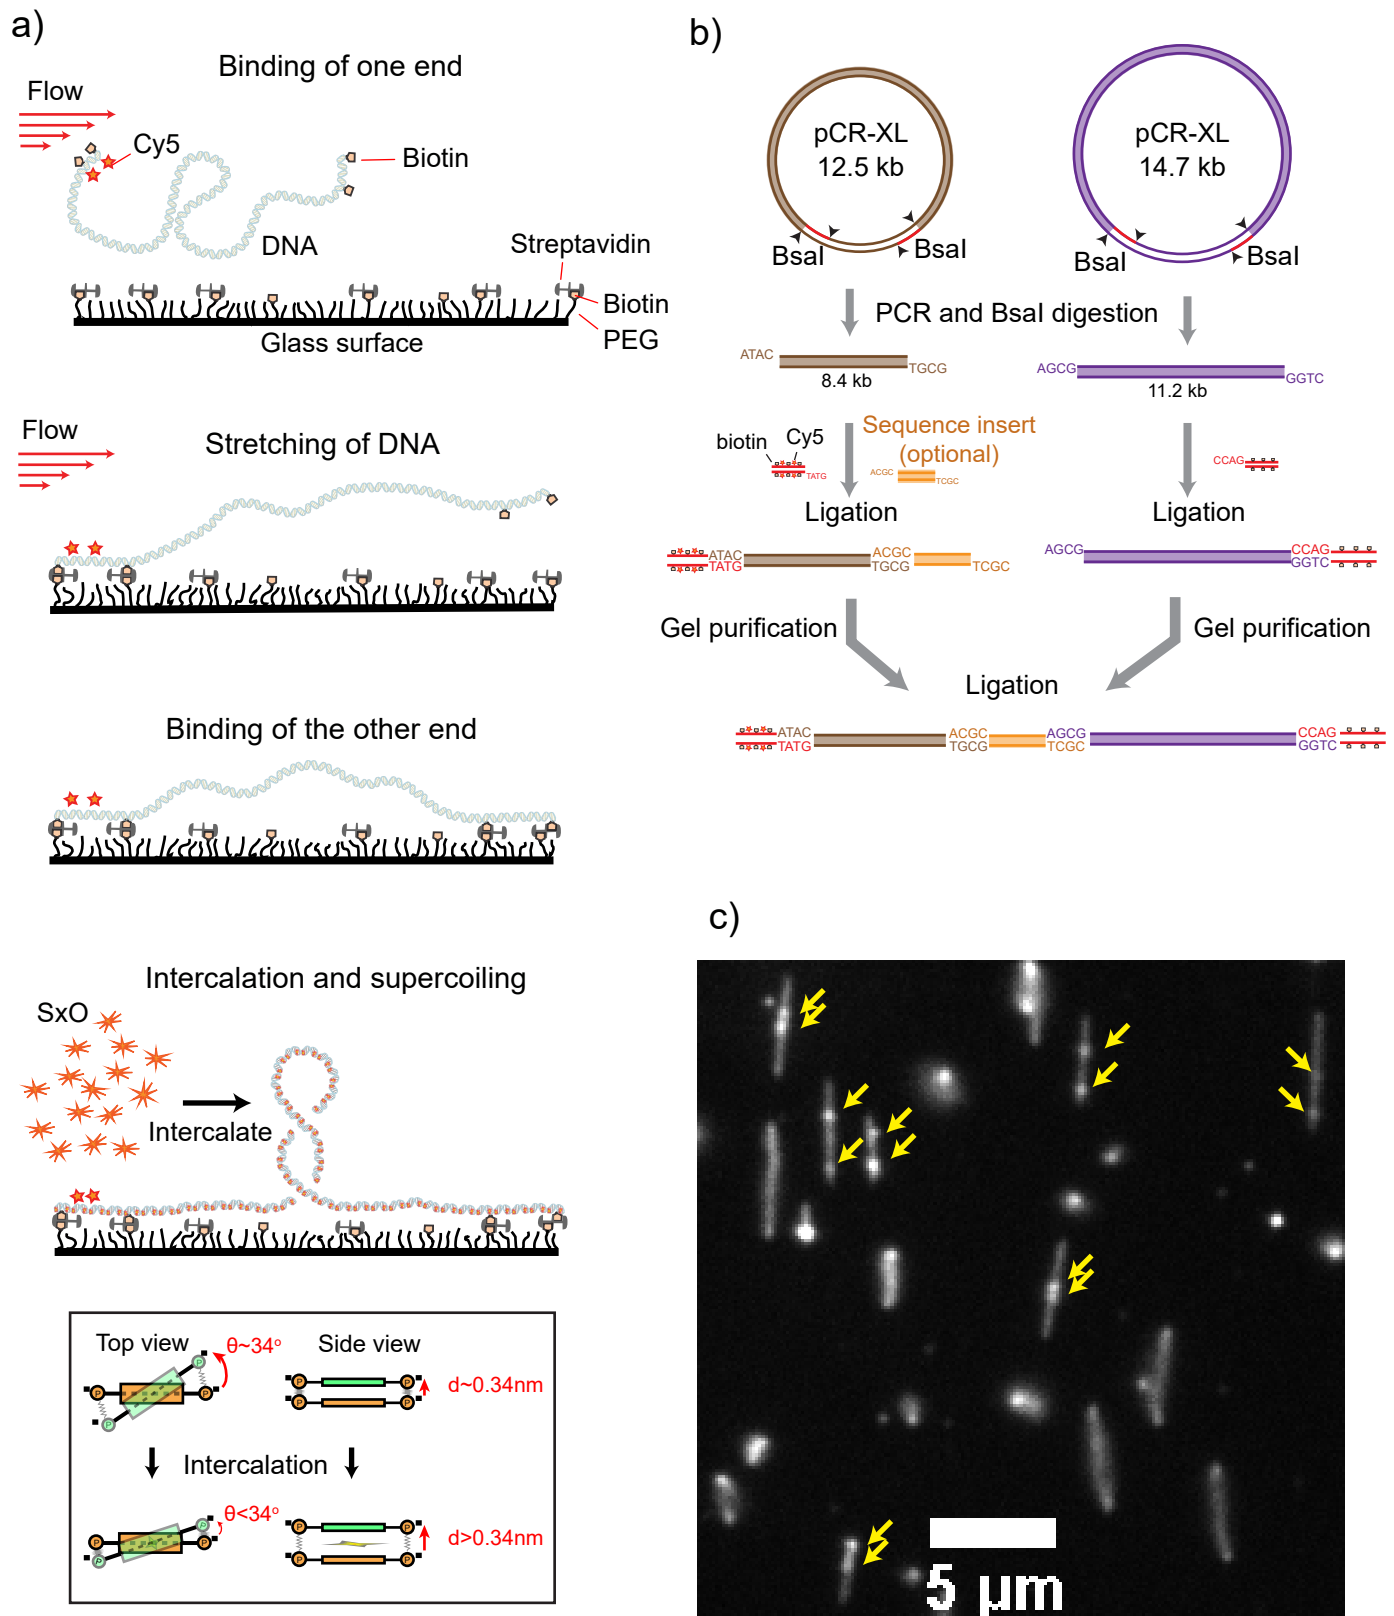

Supplement: supp [file elife_poa_e36557_Figure_1_figure_supplement_1.pdf › elife_poa_e36557_Figure_1_figure_supplement_1.pdf]

Figure 1 - figure supplement 2

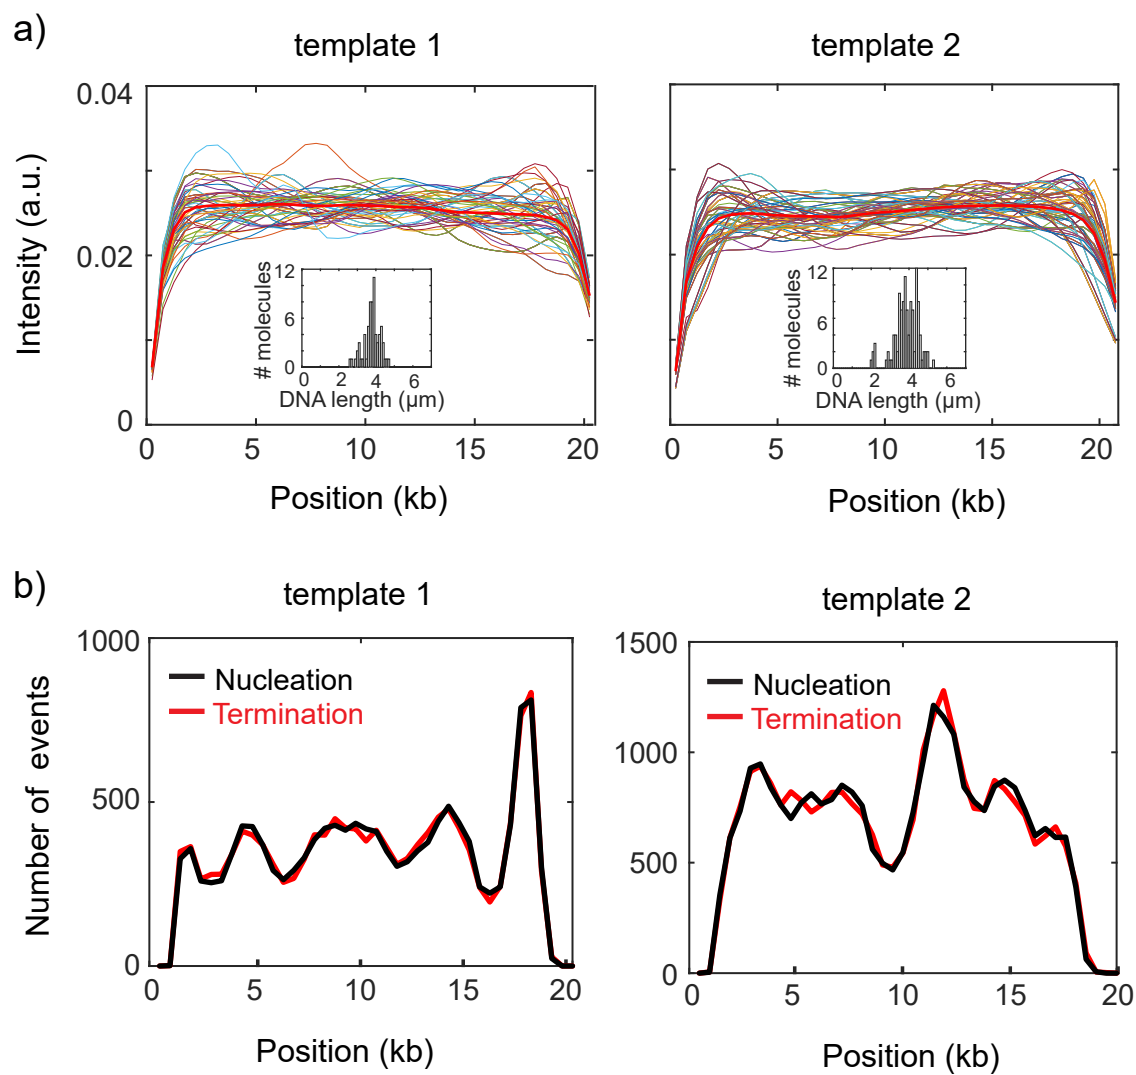

Supplement: supp [file elife_poa_e36557_Figure_1_figure_supplement_2.pdf › elife_poa_e36557_Figure_1_figure_supplement_2.pdf]

Figure 2 - figure supplement 1

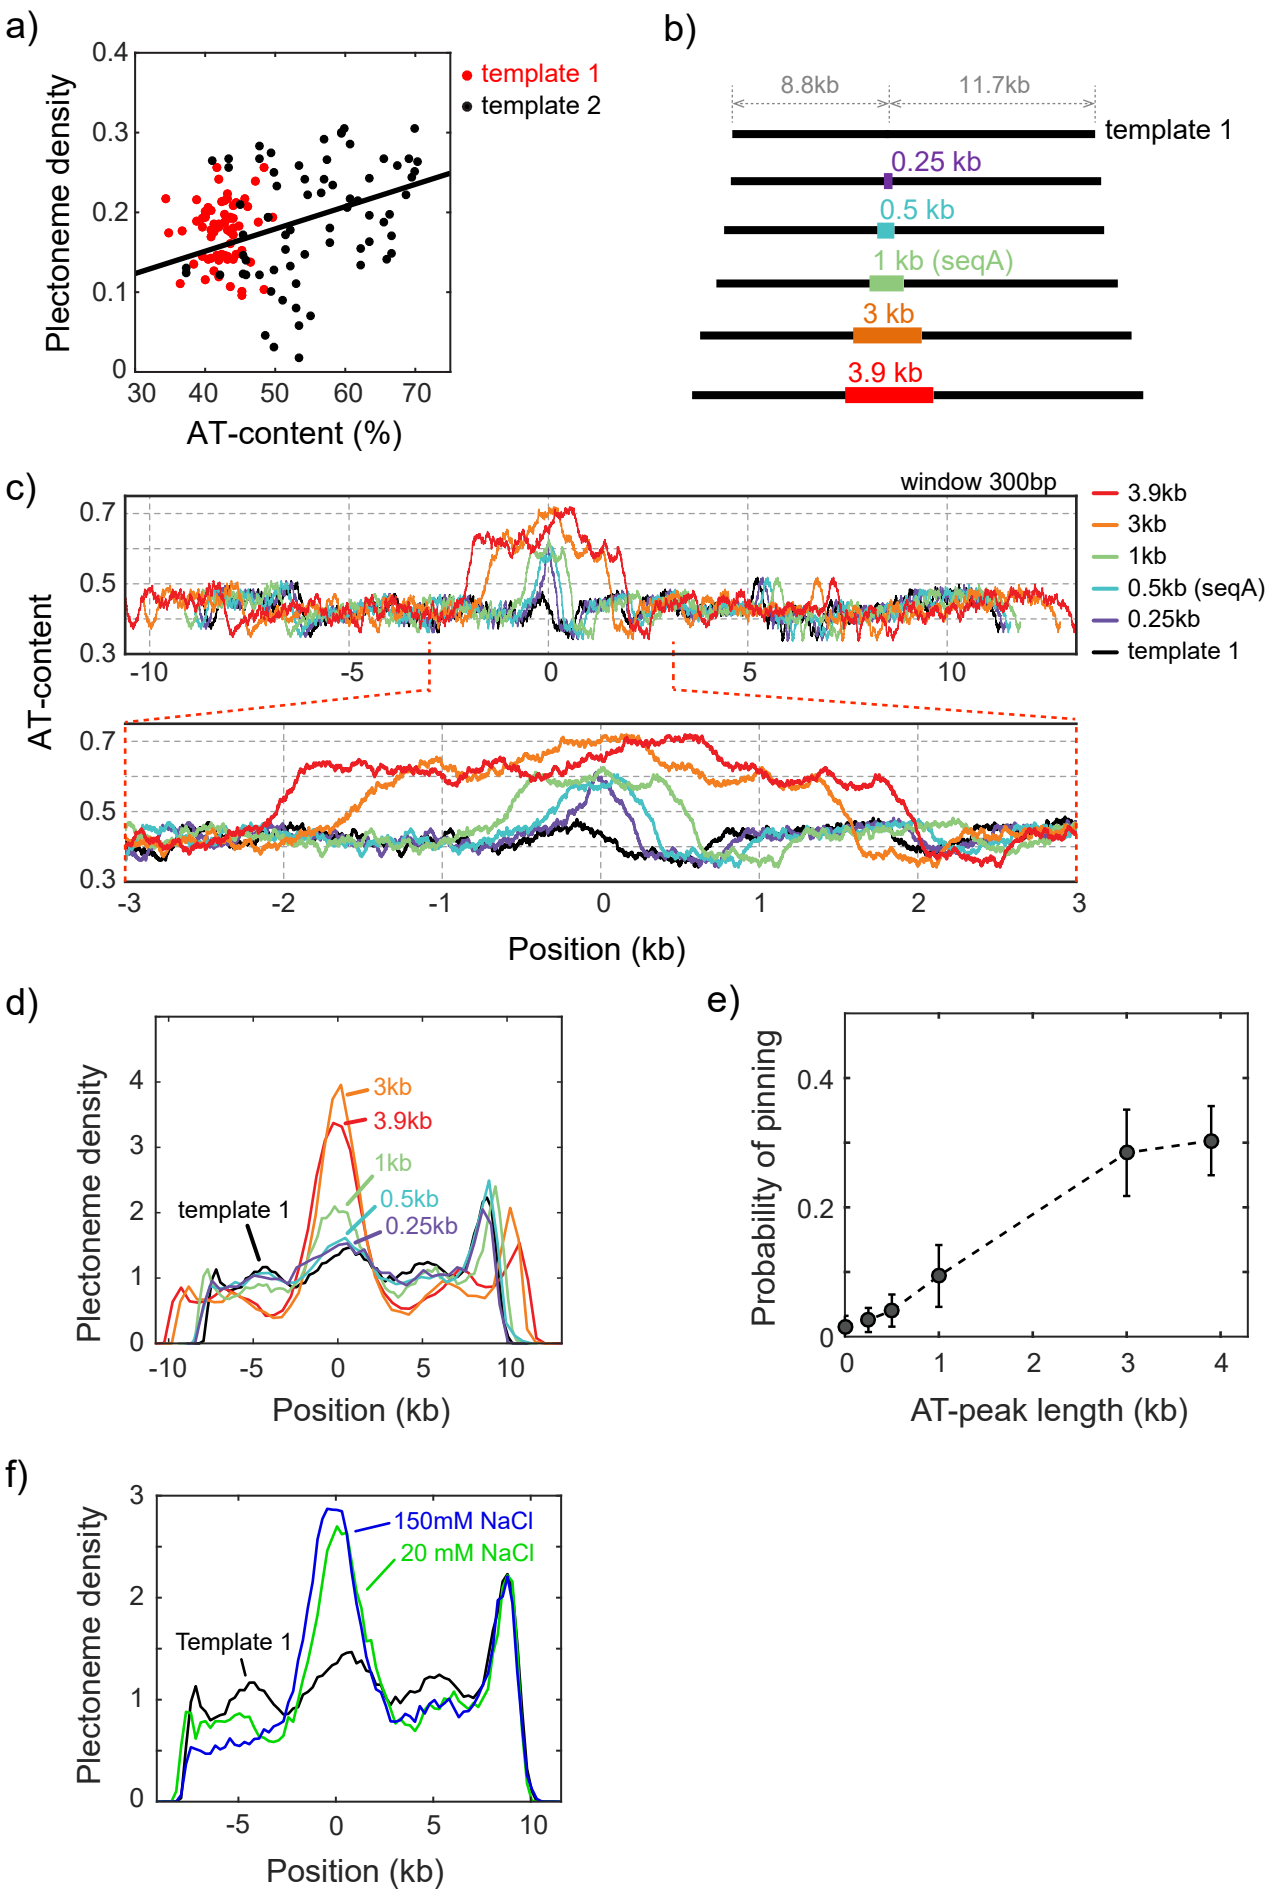

Supplement: supp [file elife_poa_e36557_Figure_2_figure_supplement_1.pdf › elife_poa_e36557_Figure_2_figure_supplement_1.pdf]

Figure 3 - figure supplement 1

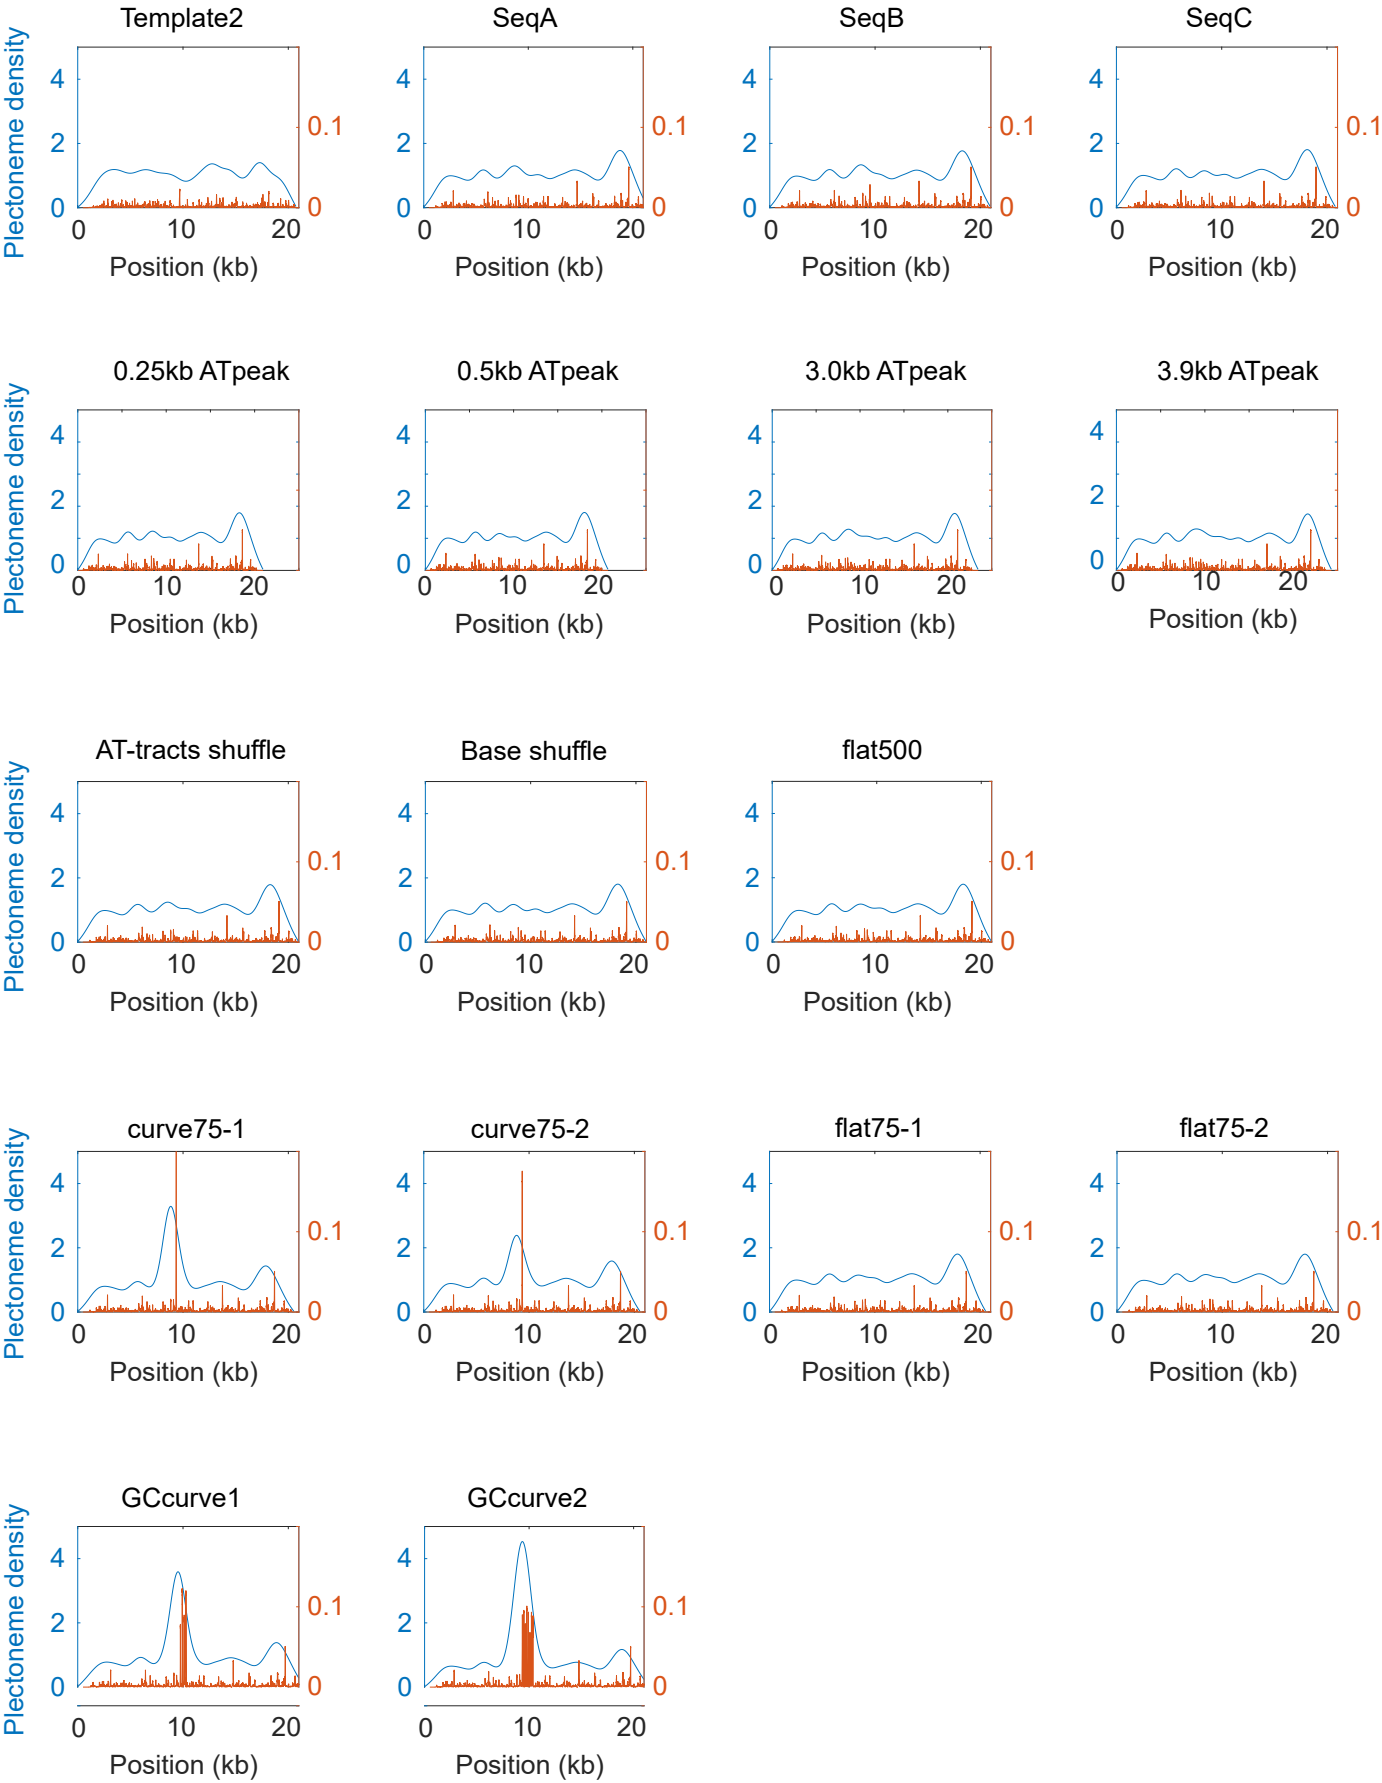

Supplement: supp [file elife_poa_e36557_Figure_3_figure_supplement_1.pdf › elife_poa_e36557_Figure_3_figure_supplement_1.pdf]

Figure 3 - figure supplement 2

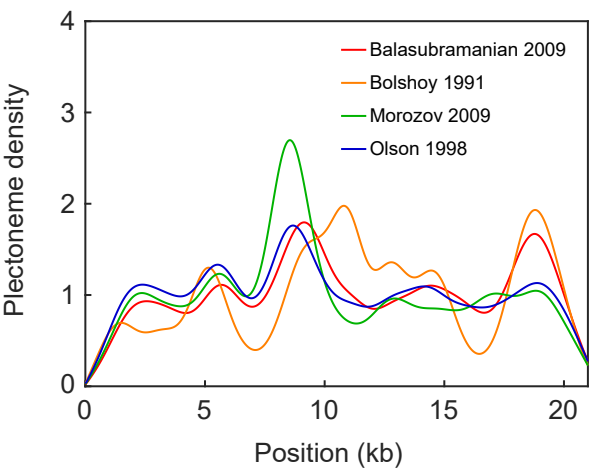

Supplement: supp [file elife_poa_e36557_Figure_3_figure_supplement_2.pdf › elife_poa_e36557_Figure_3_figure_supplement_2.pdf]
